# Supplementary material for: Reactions of nitroxides XIII: Synthesis of the Morita–Baylis–Hillman adducts bearing a nitroxyl moiety using 4-acryloyloxy-2,2,6,6-tetramethylpiperidine-1-oxyl as a starting compound, and DABCO and quinuclidine as catalysts
Source: publisher site journal article supplement (doi:10.3762/bjoc.8.171), 2012-09-12

## **Supporting Information**

for

**Reactions of nitroxides XIII: Synthesis of the Morita–Baylis–Hillman adducts bearing a nitroxyl moiety using 4-acryloyloxy-2,2,6,6-tetramethylpiperidine-1-oxyl as a starting compound, and DABCO and quinuclidine as catalysts**

Jerzy Zakrzewski

Address: Institute of Industrial Organic Chemistry, Annopol 6, 03-236 Warsaw, Poland

Email: Jerzy Zakrzewski - zakrzewski@ipo.waw.pl

**Detailed spectrographic data**

### 3, 4-Acryloyloxy-2,2,6,6-tetramethylpiperidine-1-oxyl, EIMS

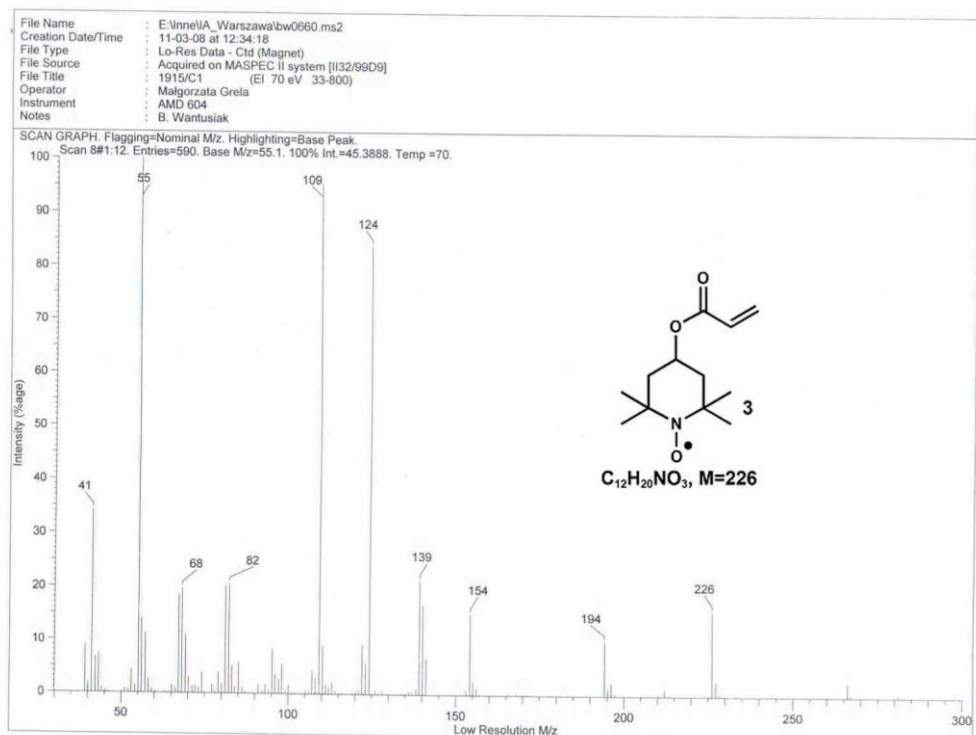

### 3, 4-Acryloyloxy-2,2,6,6-tetramethylpiperidine-1-oxyl, IR

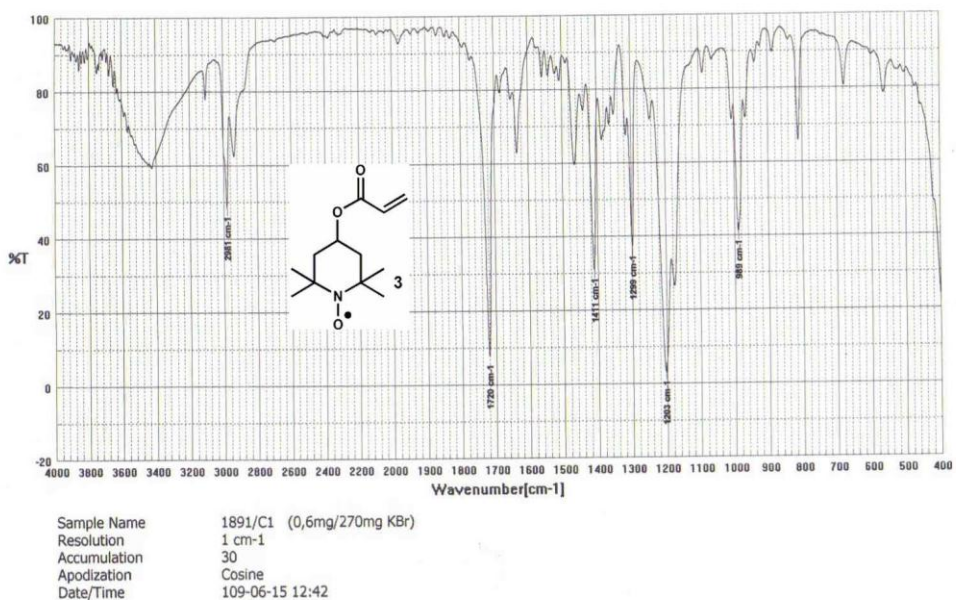

**5a**, 4-(2-(*n*-Butylhydroxymethyl)acryloyloxy)-2,2,6,6-tetramethylpiperidine-1-oxyl, R=*n*-C<sub>4</sub>H<sub>9</sub>, EIMS

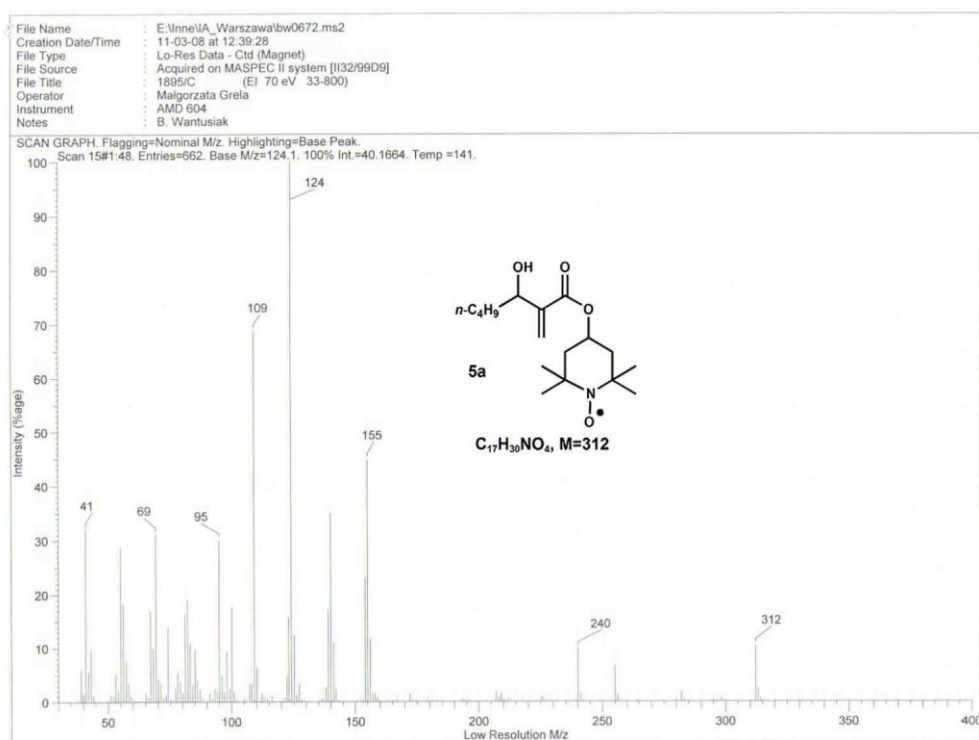

**5a**, 4-(2-(*n*-Butylhydroxymethyl)acryloyloxy)-2,2,6,6-tetramethylpiperidine-1-oxyl, R=*n*-C<sub>4</sub>H<sub>9</sub>, IR

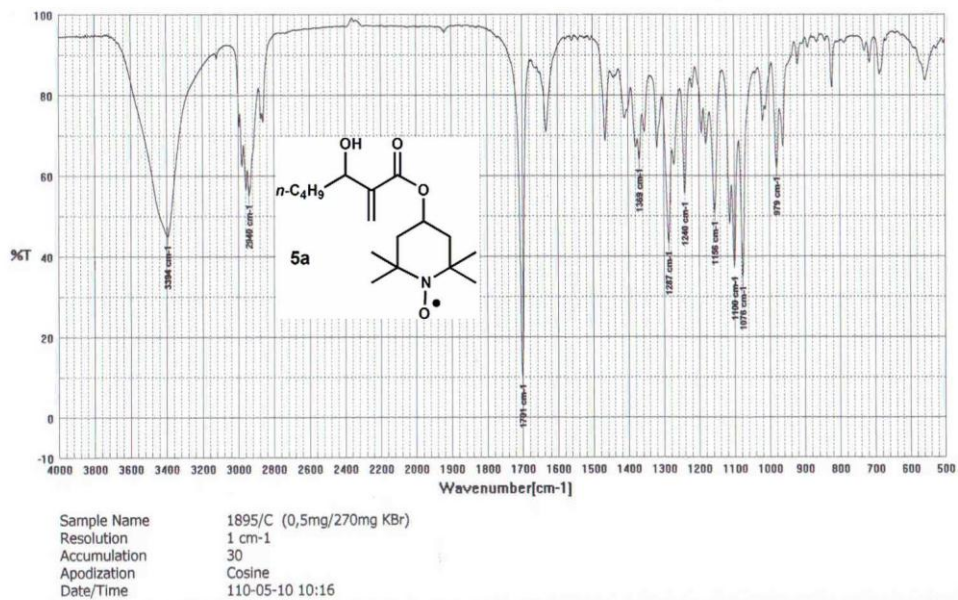

**5b**, 4-(2-(*t*-Butylhydroxymethyl)acryloyloxy)-2,2,6,6-tetramethylpiperidine-1-oxyl, R=*t*-C<sub>4</sub>H<sub>9</sub>, EIMS

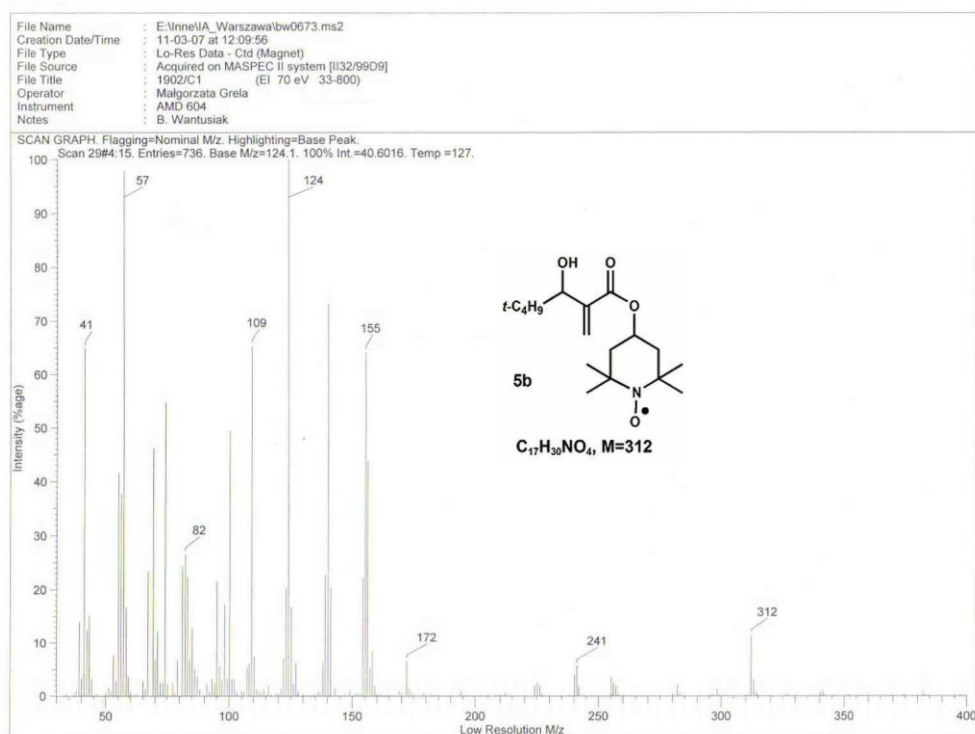

**5b**, 4-(2-(*t*-Butylhydroxymethyl)acryloyloxy)-2,2,6,6-tetramethylpiperidine-1-oxyl, R=*t*-C<sub>4</sub>H<sub>9</sub>, IR

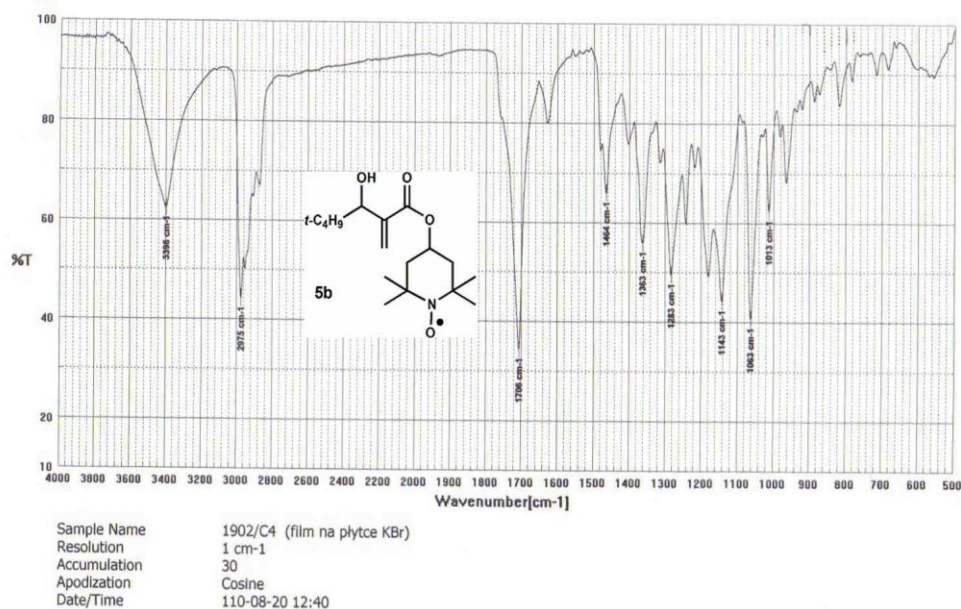

**5c**, 4-(2-(Trichloromethylhydroxymethyl)acryloyloxy)-2,2,6,6-tetramethylpiperidine-1-oxyl, R=CCl<sub>3</sub>, EIMS

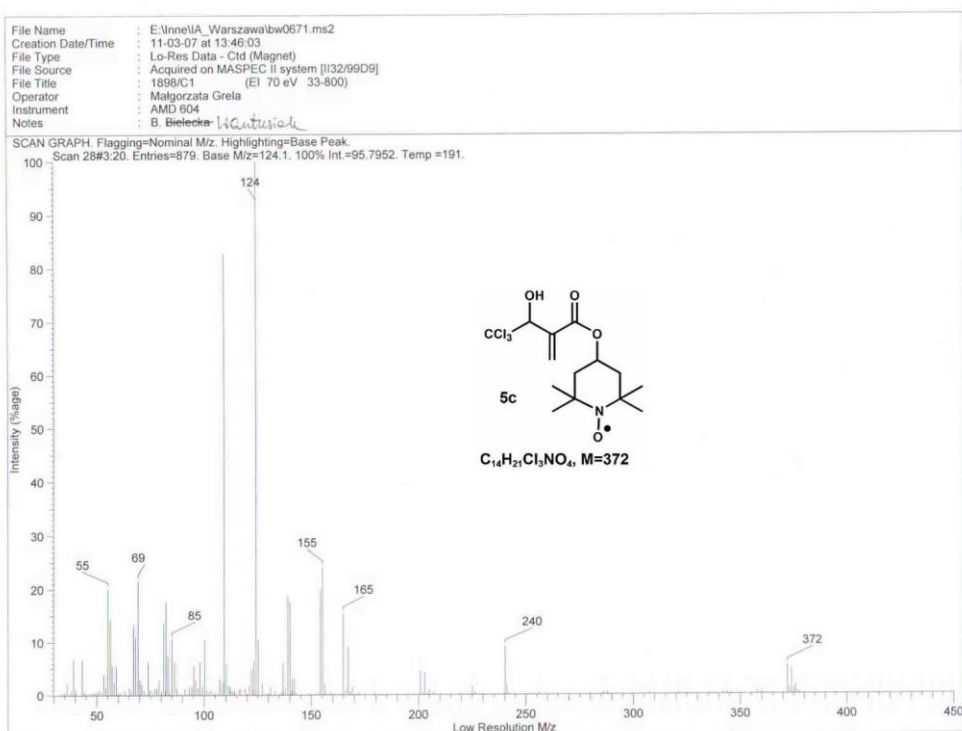

**5c**, 4-(2-(Trichloromethylhydroxymethyl)acryloyloxy)-2,2,6,6-tetramethylpiperidine-1-oxyl, R=CCl<sub>3</sub>, IR

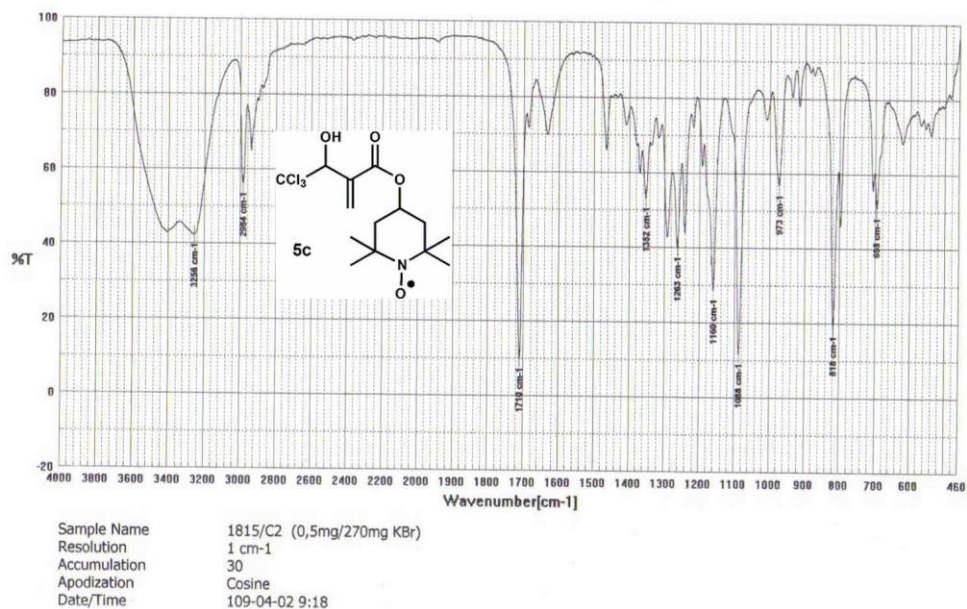

**5d**, 4-(2-(Phenylhydroxymethyl)acryloyloxy)-2,2,6,6-tetramethylpiperidine-1-oxyl, R=C<sub>6</sub>H<sub>5</sub>, EIMS

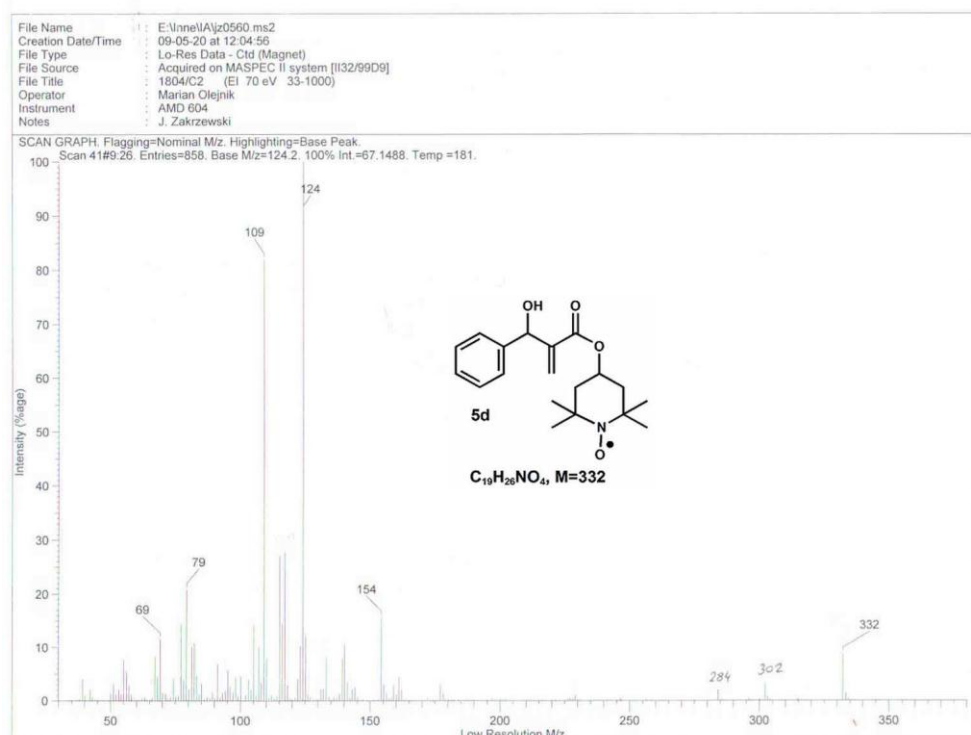

**5d**, 4-(2-(Phenylhydroxymethyl)acryloyloxy)-2,2,6,6-tetramethylpiperidine-1-oxyl, R=C<sub>6</sub>H<sub>5</sub>, IR

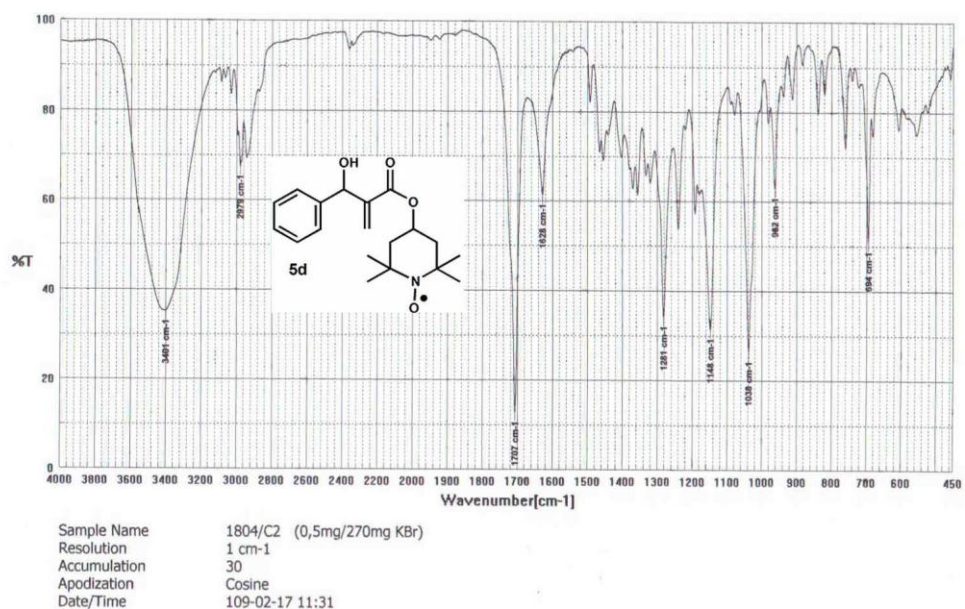

**5d**, 4-(2-(Phenylhydroxymethyl)acryloyloxy)-2,2,6,6-tetramethylpiperidine-1-oxyl, R=C<sub>6</sub>H<sub>5</sub>;  
<sup>1</sup>H NMR: **5d** reduced *in situ* with C<sub>6</sub>H<sub>5</sub>NHNH<sub>2</sub> in an NMR tube

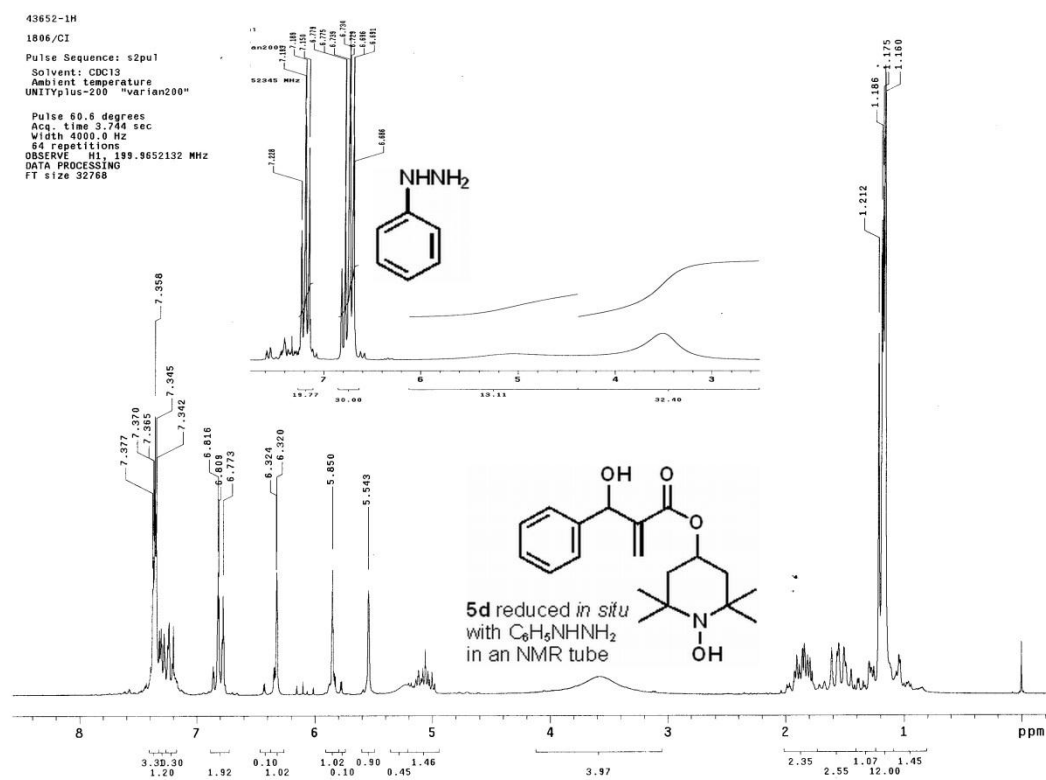

**5d**, 4-(2-(Phenylhydroxymethyl)acryloyloxy)-2,2,6,6-tetramethylpiperidine-1-oxyl, R=C<sub>6</sub>H<sub>5</sub>;  
<sup>13</sup>C NMR: **5d** reduced *in situ* with C<sub>6</sub>H<sub>5</sub>NHNH<sub>2</sub> in an NMR tube

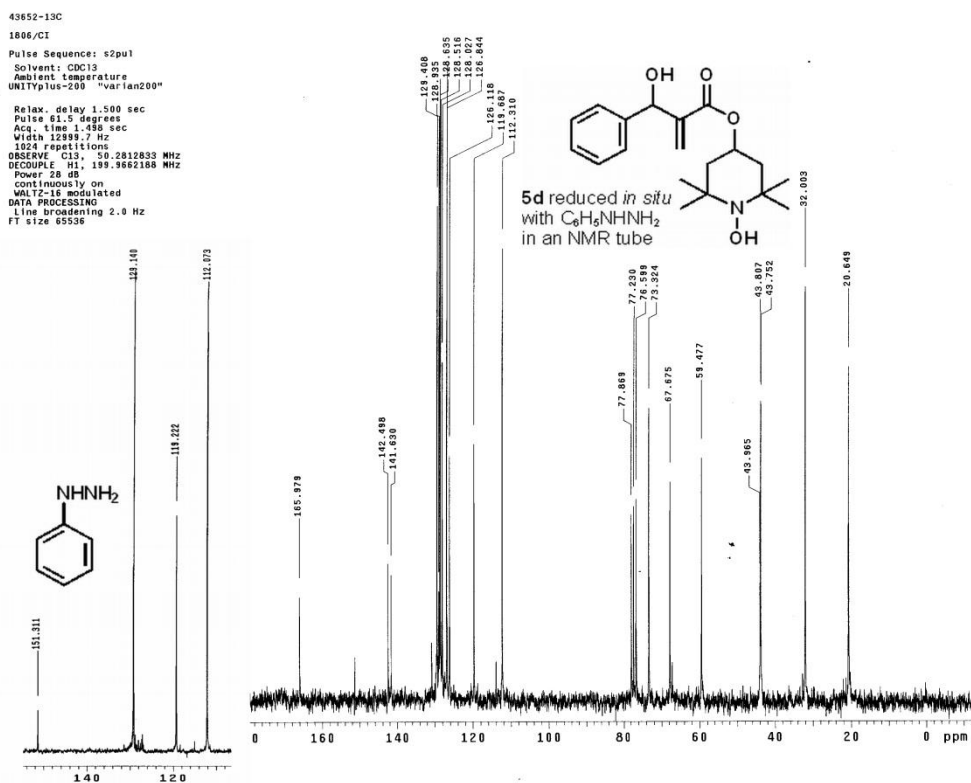

**5d**, 4-(2-(Phenylhydroxymethyl)acryloyloxy)-2,2,6,6-tetramethylpiperidine-1-oxyl, R=C<sub>6</sub>H<sub>5</sub>;  
<sup>13</sup>C NMR, DEPT 135°: **5d** reduced *in situ* with C<sub>6</sub>H<sub>5</sub>NHNH<sub>2</sub> in an NMR tube

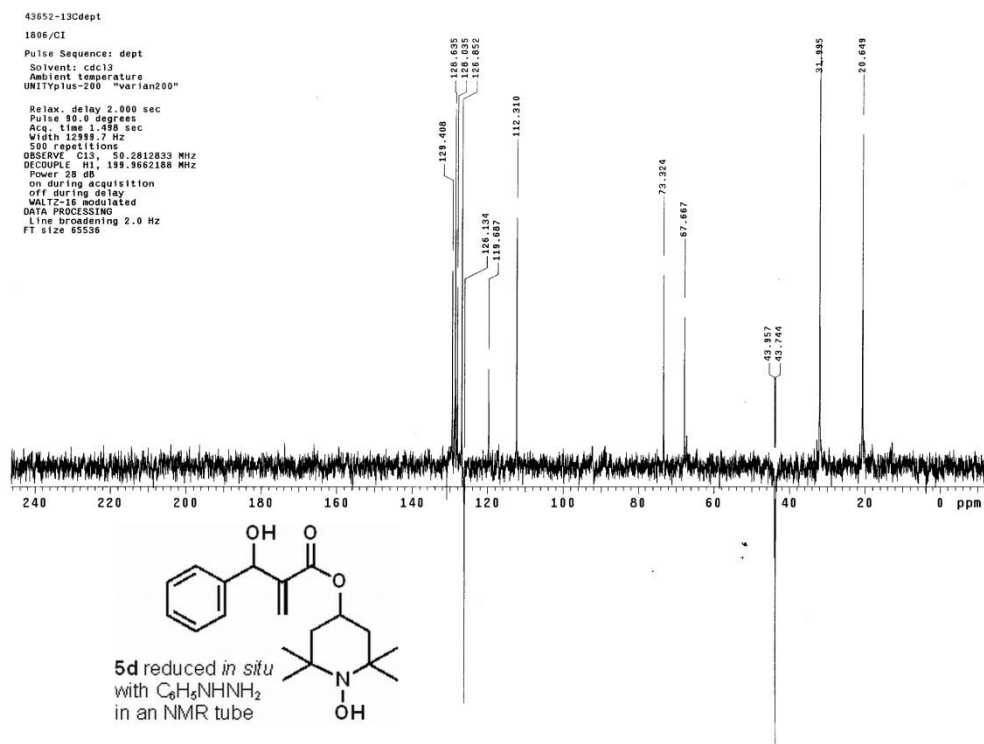



**5e**, 4-(2-((4-Methylphenyl)hydroxymethyl)acryloyloxy)-2,2,6,6-tetramethylpiperidine-1-oxyl, R=4-CH<sub>3</sub>C<sub>6</sub>H<sub>4</sub>, EIMS

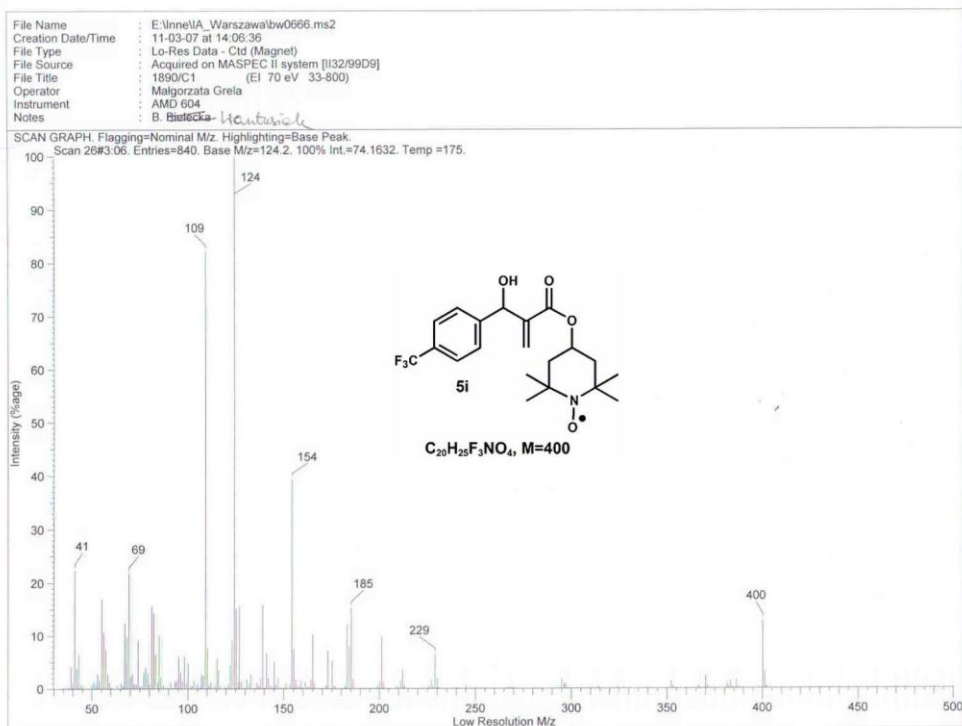

**5e**, 4-(2-((4-Methylphenyl)hydroxymethyl)acryloyloxy)-2,2,6,6-tetramethylpiperidine-1-oxyl, R=4-CH<sub>3</sub>C<sub>6</sub>H<sub>4</sub>, IR

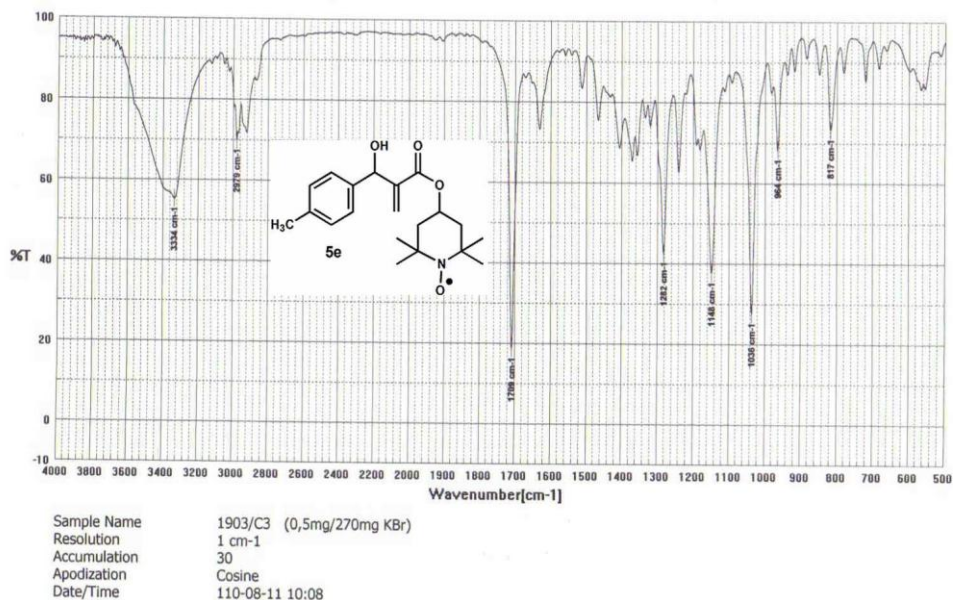

**5f**, 4-(2-((4-Methoxyphenyl)hydroxymethyl)acryloyloxy)-2,2,6,6-tetramethylpiperidine-1-oxyl, R=4-CH<sub>3</sub>OC<sub>6</sub>H<sub>4</sub>, EIMS

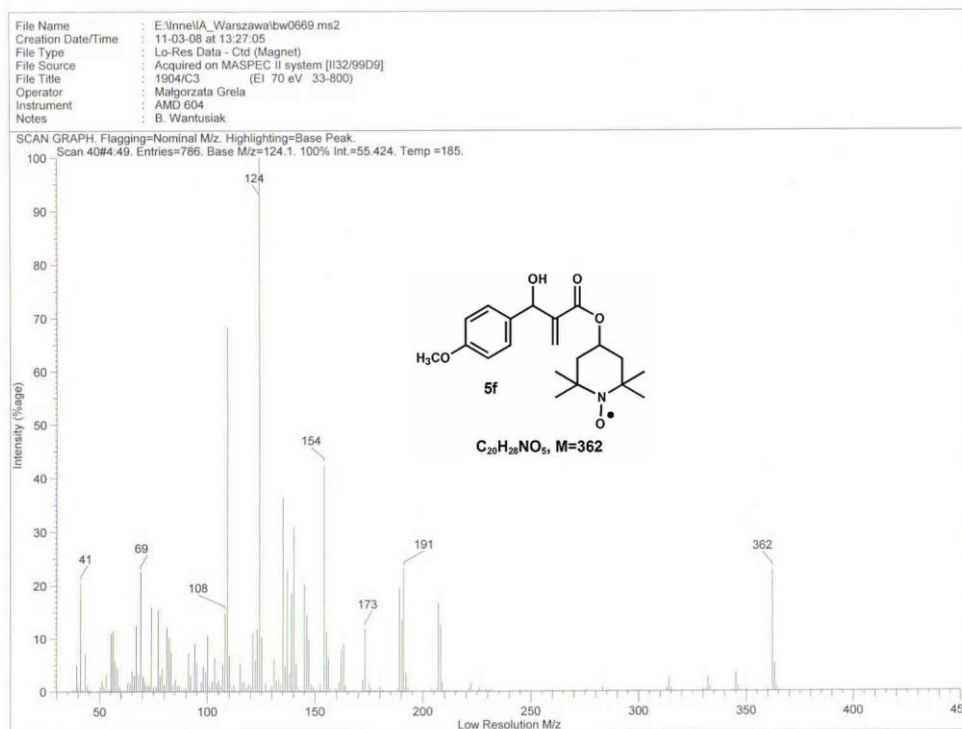

**5f**, 4-(2-((4-Methoxyphenyl)hydroxymethyl)acryloyloxy)-2,2,6,6-tetramethylpiperidine-1-oxyl, R=4-CH<sub>3</sub>OC<sub>6</sub>H<sub>4</sub>, IR

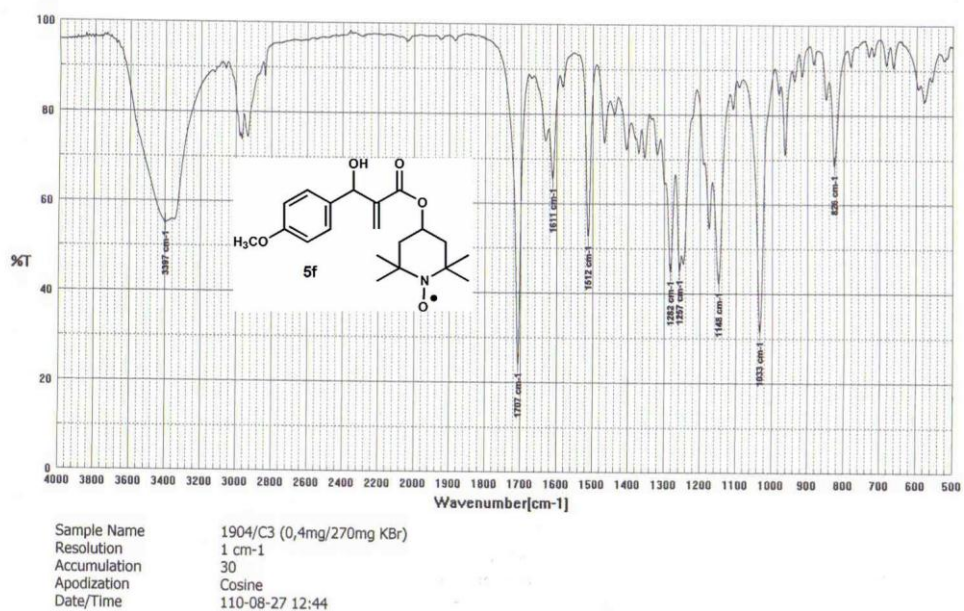

**5g**, 4-(2-((4-Fluorophenyl)hydroxymethyl)acryloyloxy)-2,2,6,6-tetramethylpiperidine-1-oxyl, R=4-FC<sub>6</sub>H<sub>4</sub>, EIMS

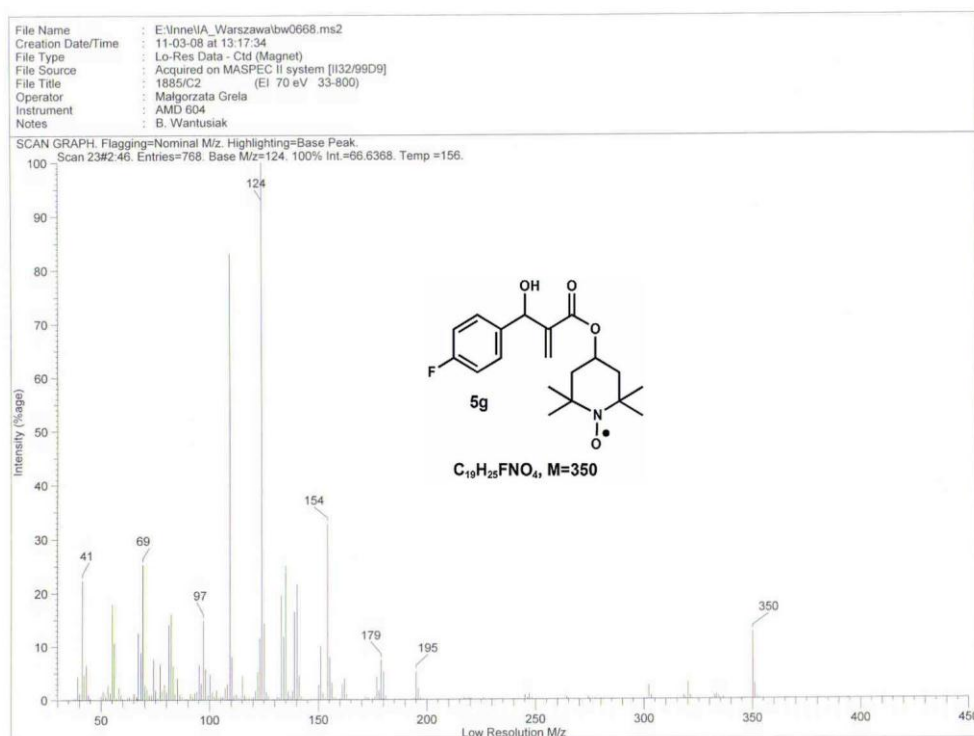

**5g**, 4-(2-((4-Fluorophenyl)hydroxymethyl)acryloyloxy)-2,2,6,6-tetramethylpiperidine-1-oxyl, R=4-FC<sub>6</sub>H<sub>4</sub>, IR

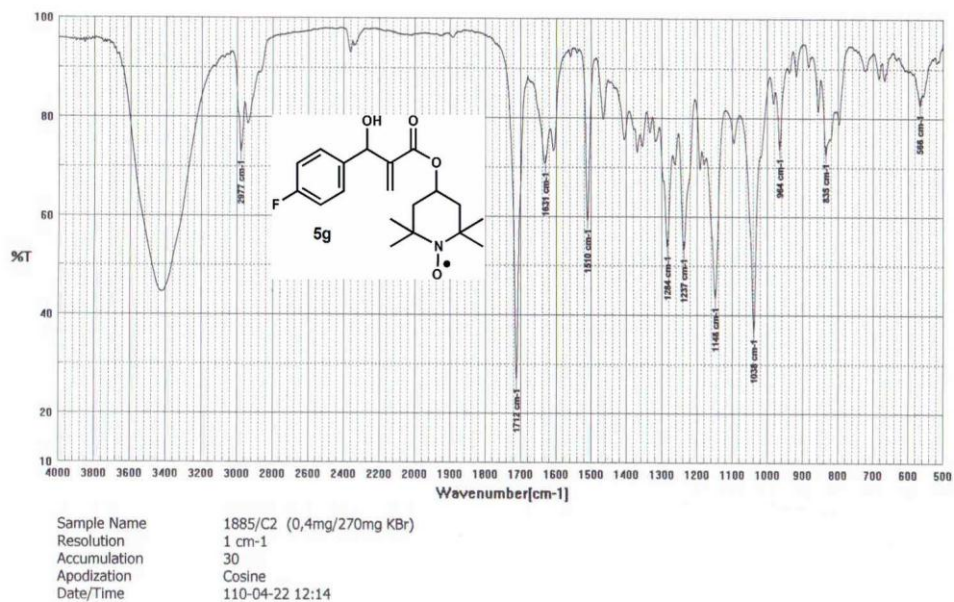

**5h**, 4-(2-((4-Bromophenyl)hydroxymethyl)acryloyloxy)-2,2,6,6-tetramethylpiperidine-1-oxyl, R=4-BrC<sub>6</sub>H<sub>4</sub>, EIMS

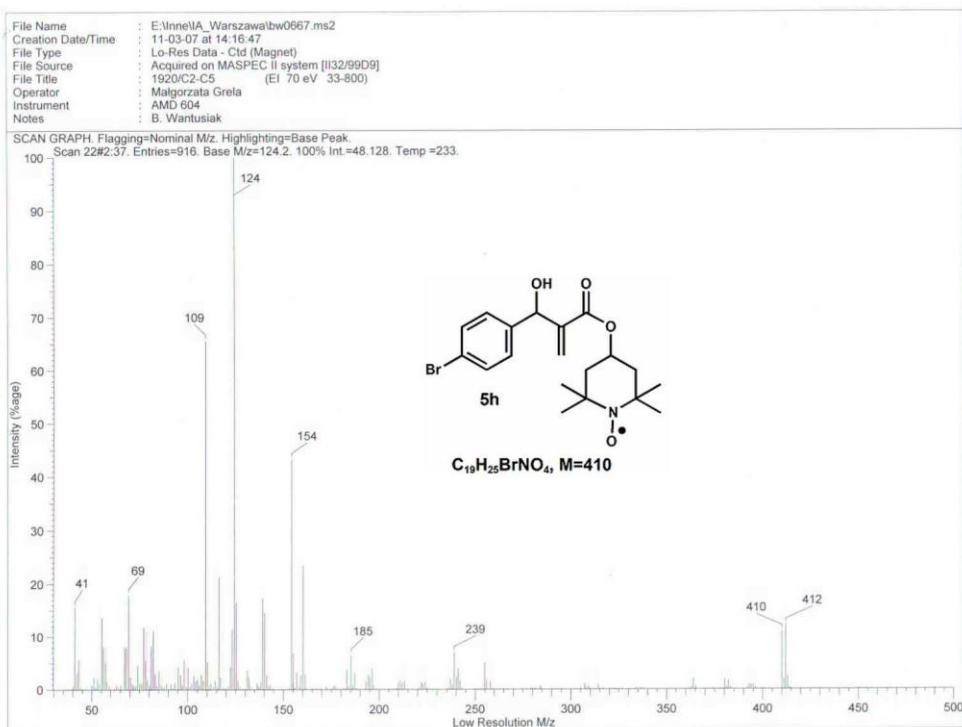

**5h**, 4-(2-((4-Bromophenyl)hydroxymethyl)acryloyloxy)-2,2,6,6-tetramethylpiperidine-1-oxyl, R=4-BrC<sub>6</sub>H<sub>4</sub>, IR

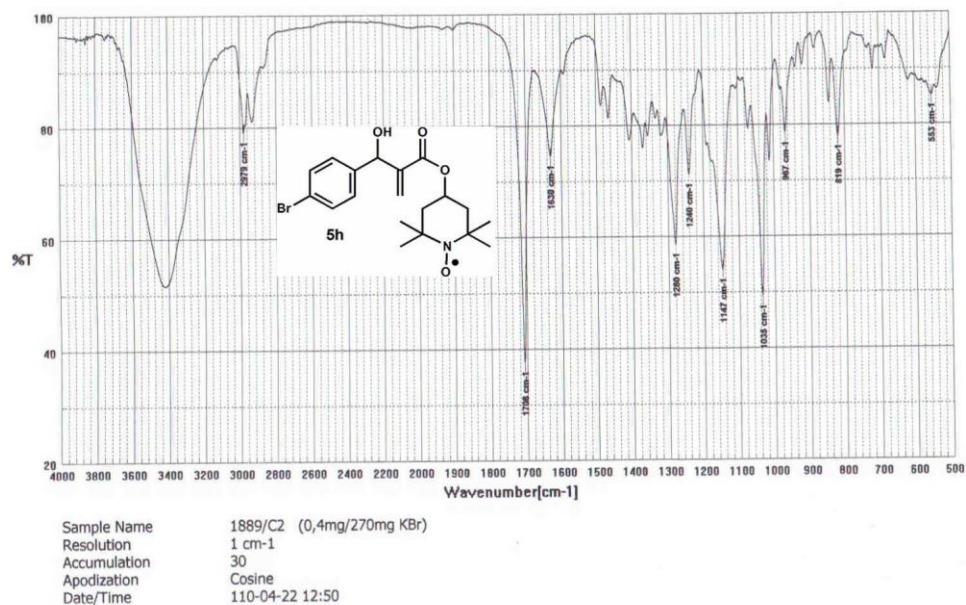

**5i**, 4-(2-((4-Trifluoromethylphenyl)hydroxymethyl)acryloyloxy)-2,2,6,6-tetramethylpiperidine-1-oxyl, R=4-CF<sub>3</sub>C<sub>6</sub>H<sub>4</sub>, EIMS

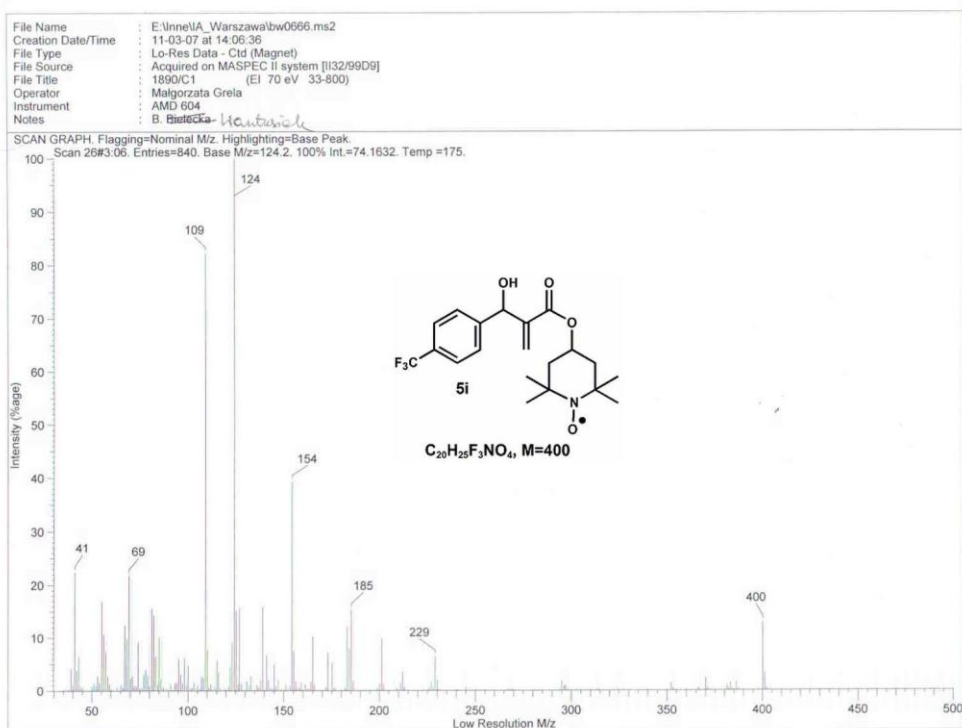

**5i**, 4-(2-((4-Trifluoromethylphenyl)hydroxymethyl)acryloyloxy)-2,2,6,6-tetramethylpiperidine-1-oxyl, R=4-CF<sub>3</sub>C<sub>6</sub>H<sub>4</sub>, IR

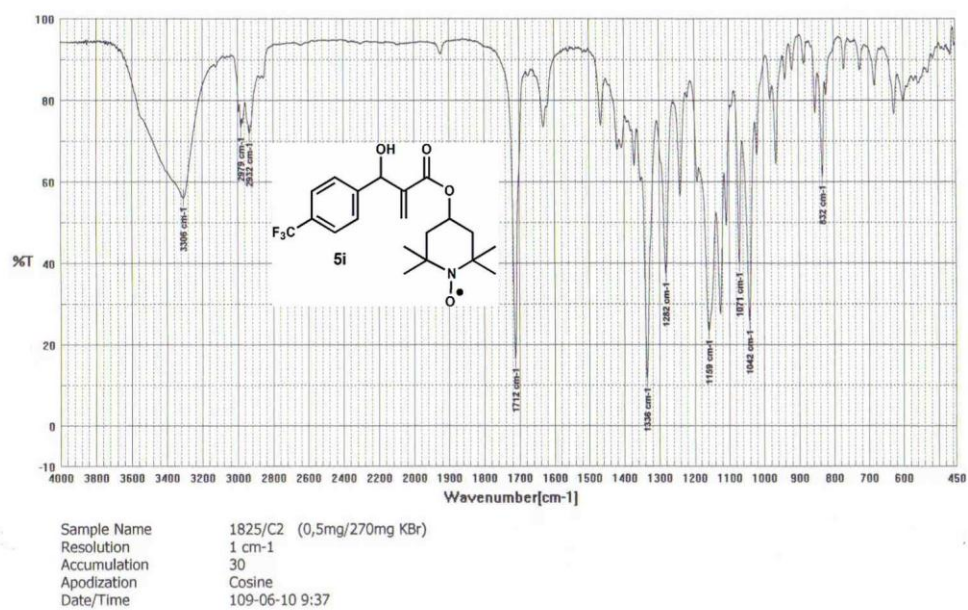

**5j**, 4-(2-((3,5-Bis(trifluoromethyl)phenyl)hydroxymethyl)acryloyloxy)-2,2,6,6-tetramethylpiperidine-1-oxyl,  
R=3,5-di-CF<sub>3</sub>C<sub>6</sub>H<sub>3</sub>, EIMS

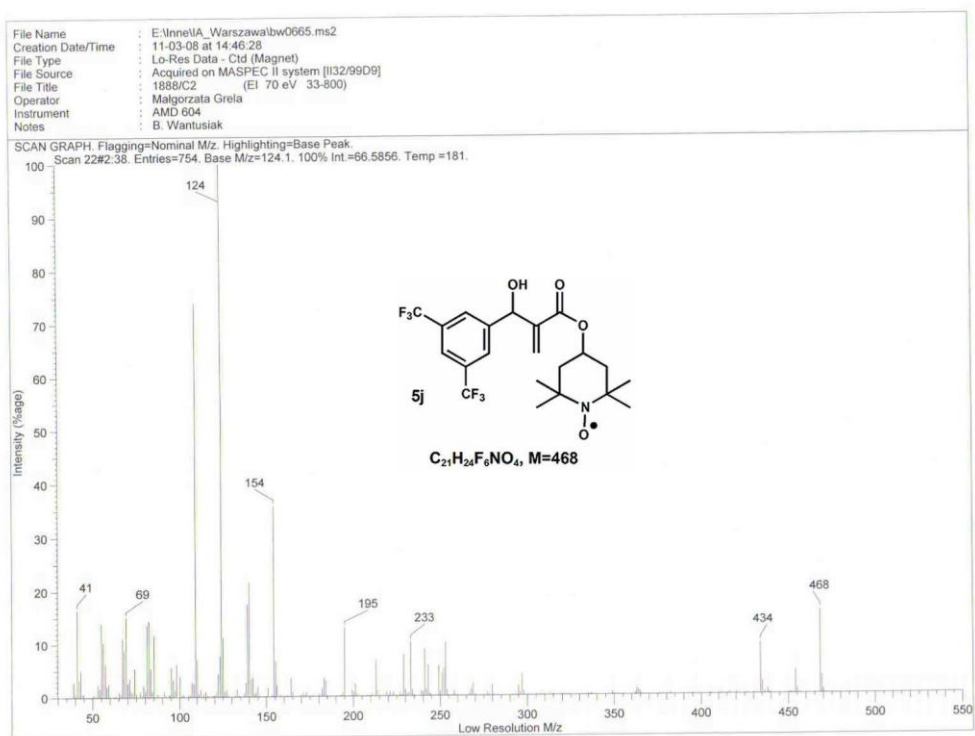

**5j**, 4-(2-((3,5-Bis(trifluoromethyl)phenyl)hydroxymethyl)acryloyloxy)-2,2,6,6-tetramethylpiperidine-1-oxyl,  
R=3,5-di-CF<sub>3</sub>C<sub>6</sub>H<sub>3</sub>, IR

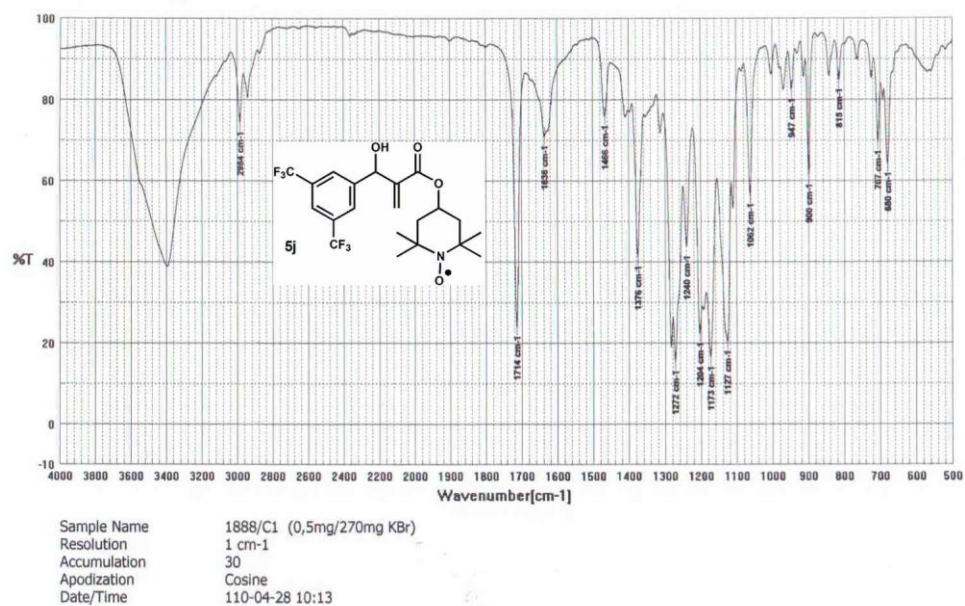

**5k**, 4-(2-((4-Nitrophenyl)hydroxymethyl)acryloyloxy)-2,2,6,6-tetramethylpiperidine-1-oxyl, R=4-NO<sub>2</sub>C<sub>6</sub>H<sub>4</sub>, EIMS

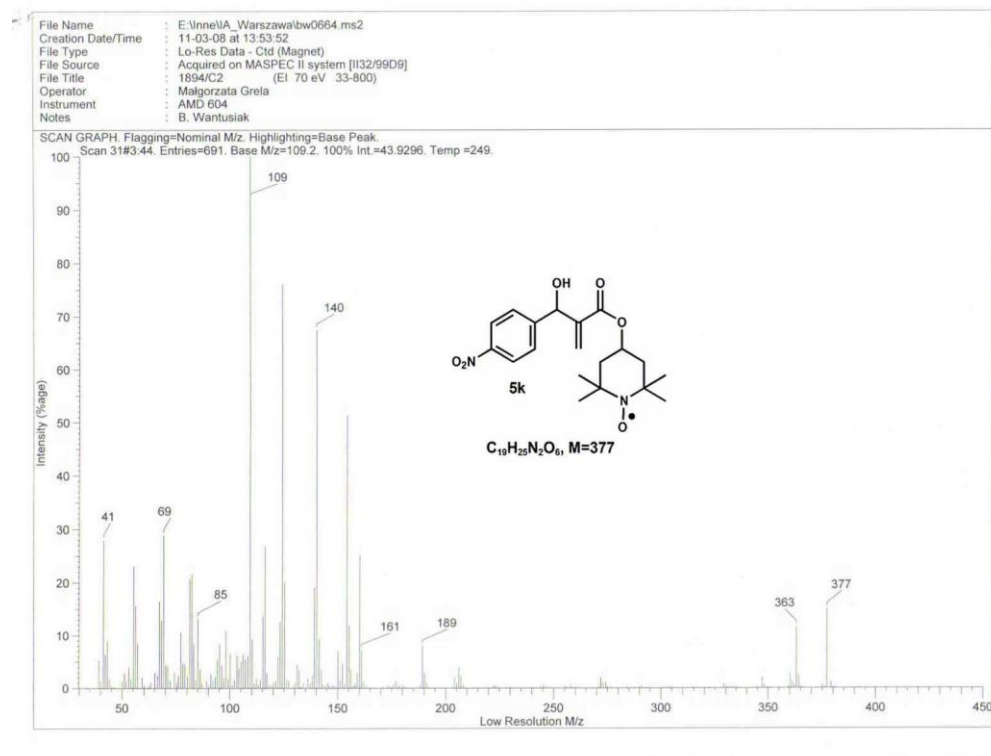

**5k**, 4-(2-((4-Nitrophenyl)hydroxymethyl)acryloyloxy)-2,2,6,6-tetramethylpiperidine-1-oxyl, R=4-NO<sub>2</sub>C<sub>6</sub>H<sub>4</sub>, IR

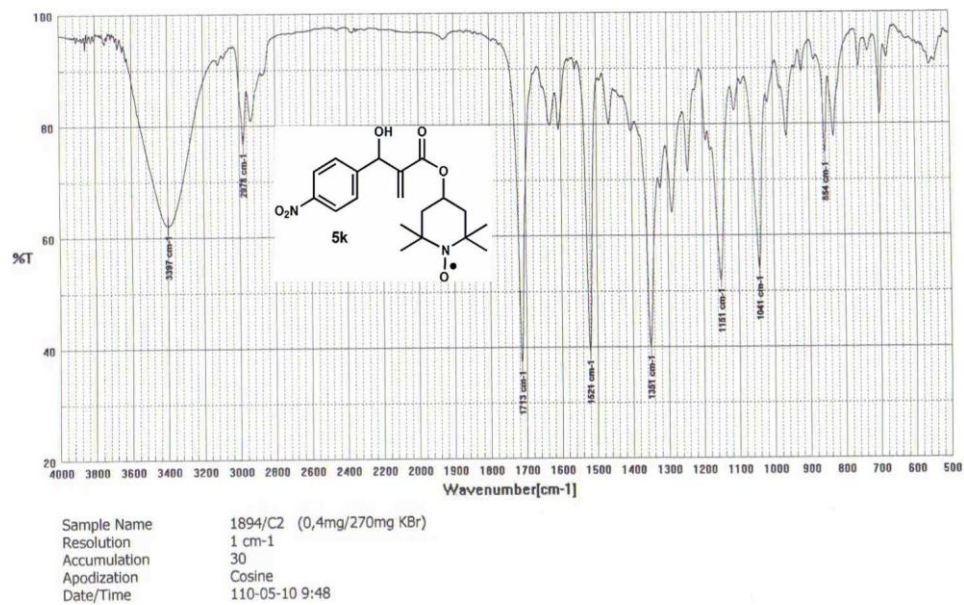

**51**, 4-(2-((2,4-Dinitrophenyl)hydroxymethyl)acryloyloxy)-2,2,6,6-tetramethylpiperidine-1-oxyl, R=2,4-di-NO<sub>2</sub>C<sub>6</sub>H<sub>3</sub>, EIMS

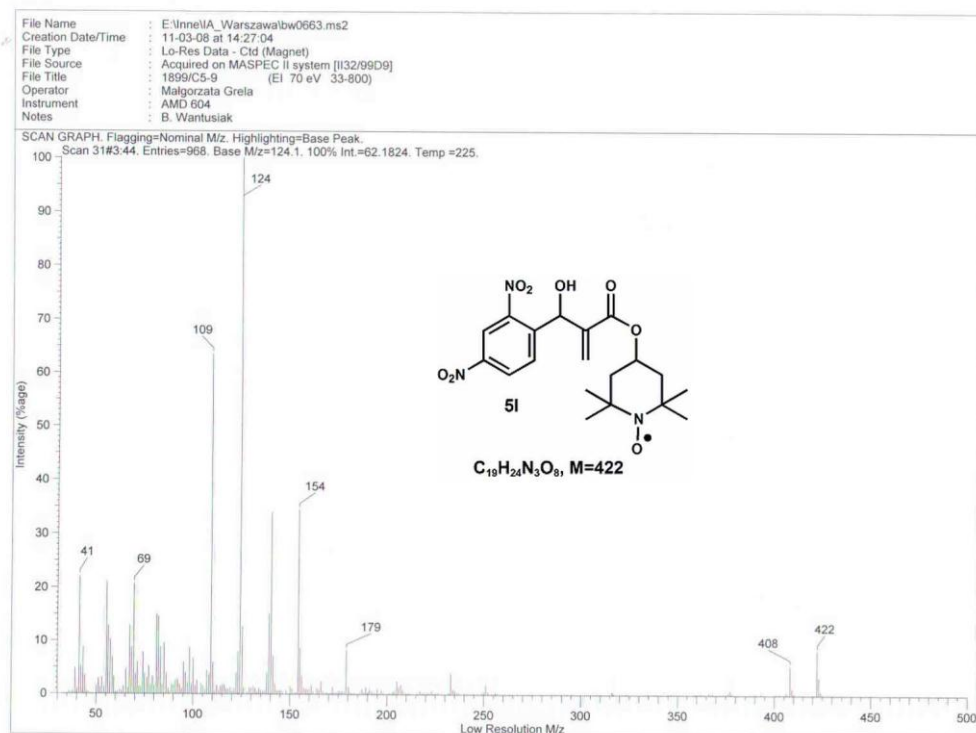

**51**, 4-(2-((2,4-Dinitrophenyl)hydroxymethyl)acryloyloxy)-2,2,6,6-tetramethylpiperidine-1-oxyl, R=2,4-di-NO<sub>2</sub>C<sub>6</sub>H<sub>3</sub>, IR

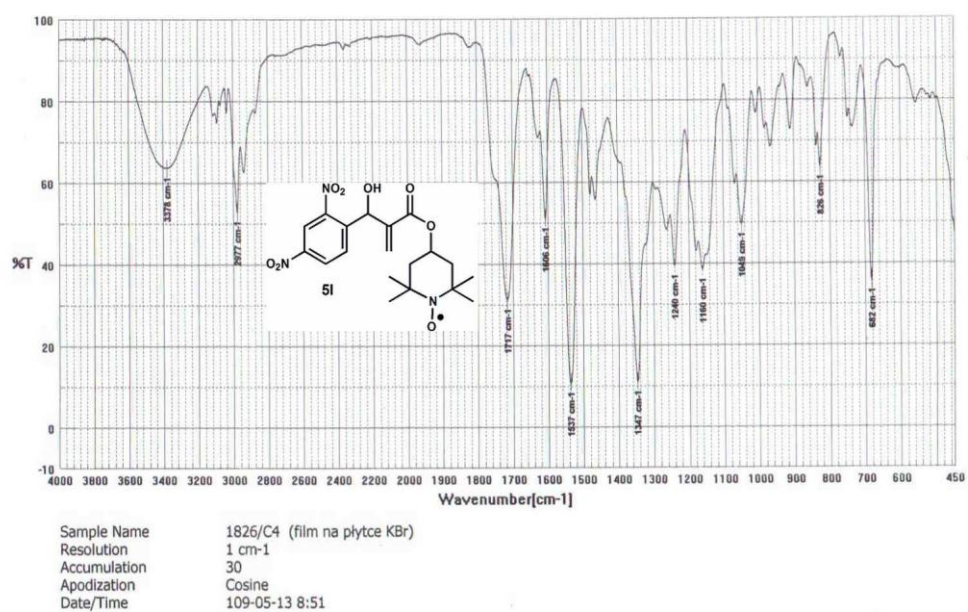



**5m**, 4-(2-((3-Pyridyl)hydroxymethyl)acryloyloxy)-2,2,6,6-tetramethylpiperidine-1-oxyl, R=3-pyridyl, EIMS

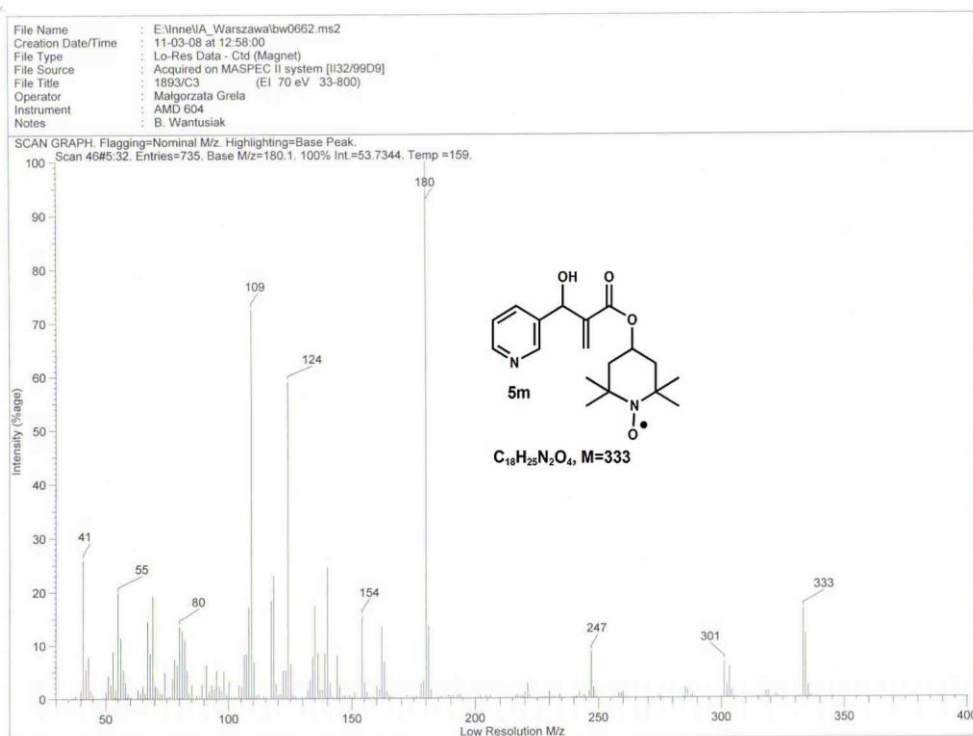

**5m**, 4-(2-((3-Pyridyl)hydroxymethyl)acryloyloxy)-2,2,6,6-tetramethylpiperidine-1-oxyl, R=3-pyridyl, IR

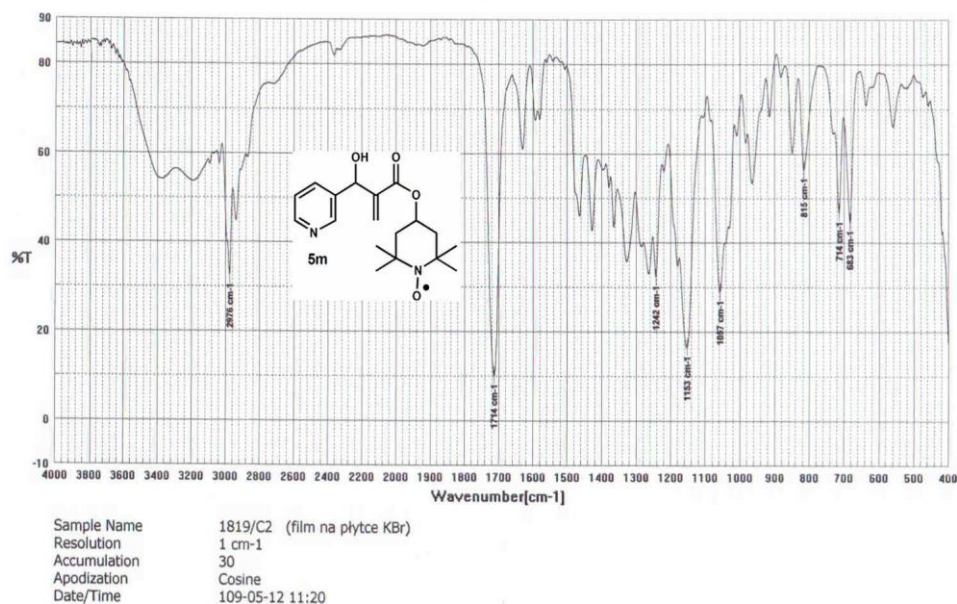

**5n**, 4-(2-((2-Furyl)hydroxymethyl)acryloyloxy)-2,2,6,6-tetramethylpiperidine-1-oxyl, R=2-furyl, EIMS

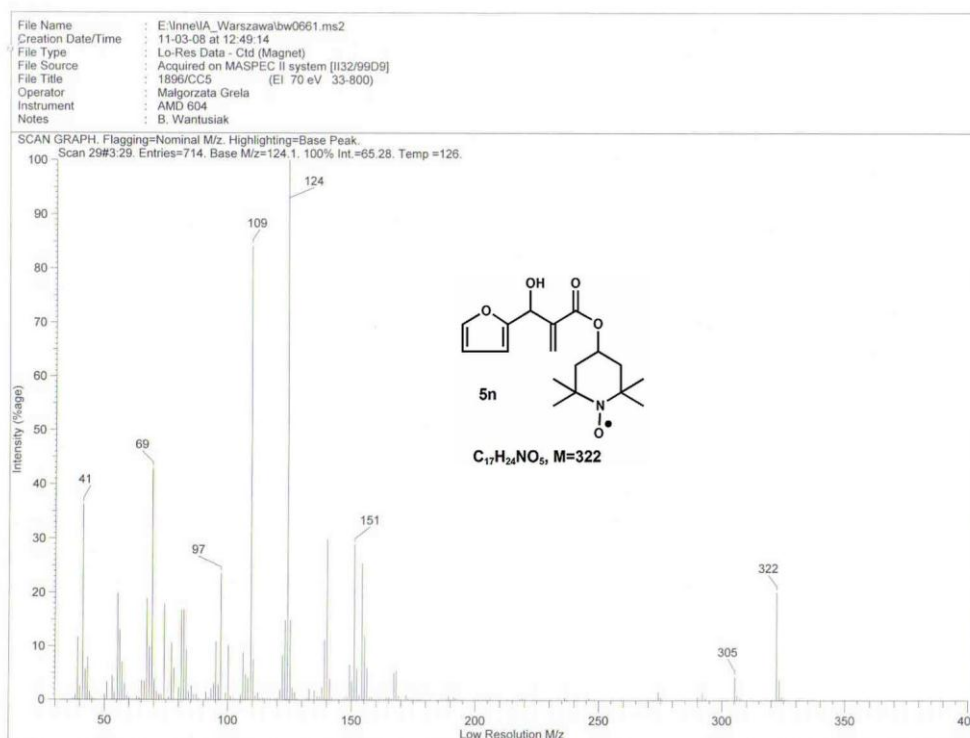

**5n**, 4-(2-((2-Furyl)hydroxymethyl)acryloyloxy)-2,2,6,6-tetramethylpiperidine-1-oxyl, R=2-furyl, IR

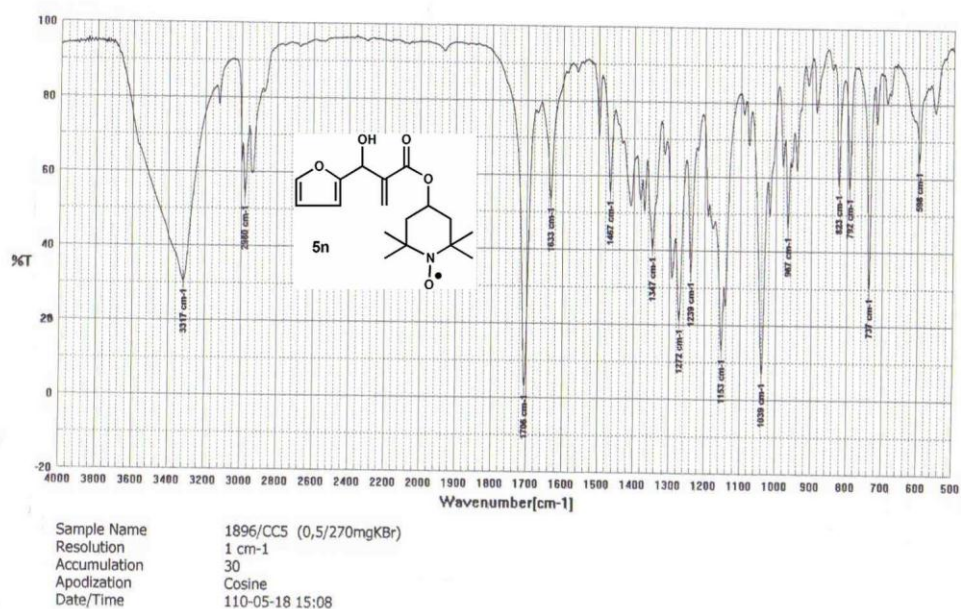

**5o**, 4-(2-((Ferrocenyl)hydroxymethyl)acryloyloxy)-2,2,6,6-tetramethylpiperidine-1-oxyl, R=ferrocenyl, EIMS

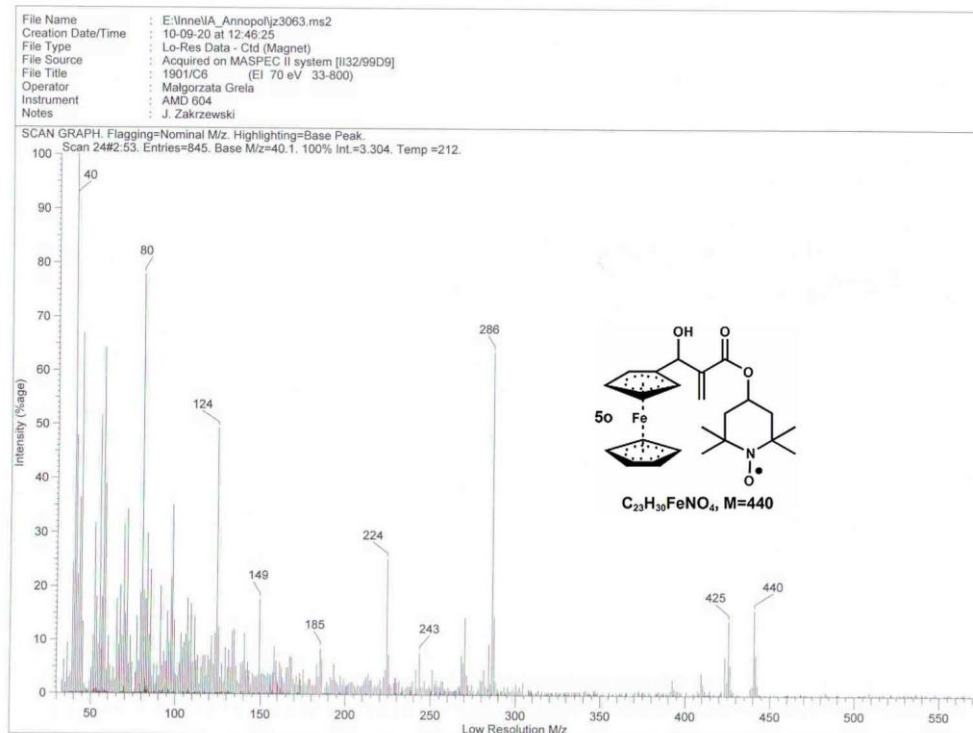

**5o**, 4-(2-((Ferrocenyl)hydroxymethyl)acryloyloxy)-2,2,6,6-tetramethylpiperidine-1-oxyl, R=ferrocenyl, IR

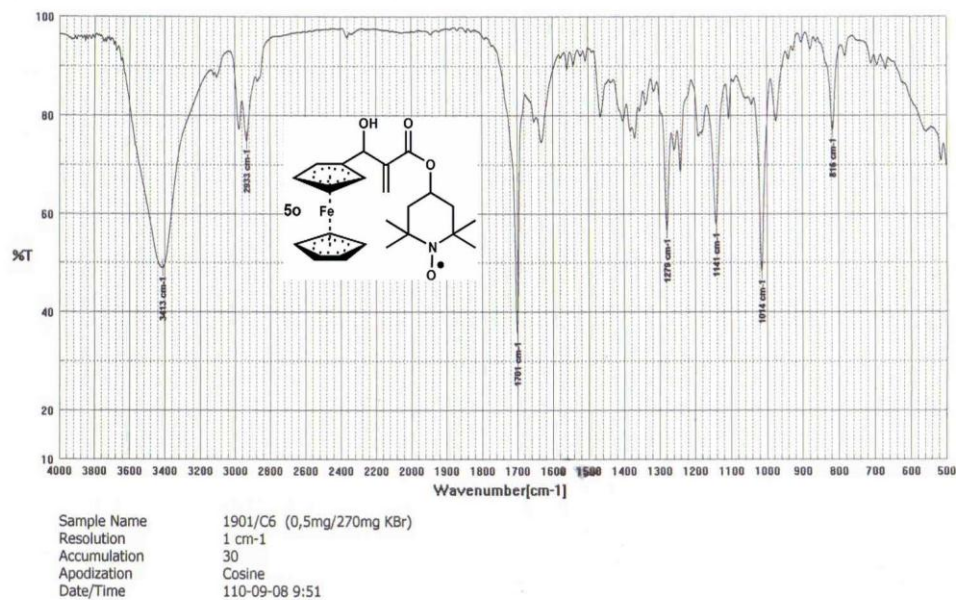

Blue fractions suggesting the presence of nitroso-compounds during the isolation of **51**

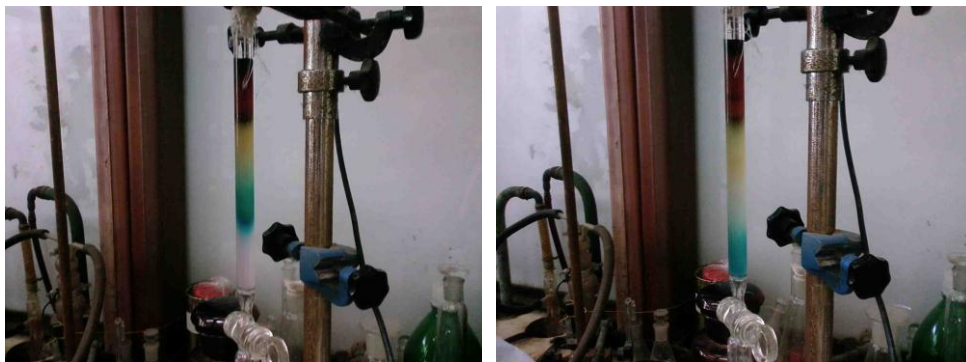

Supplement: Additional file 1 [file 1860-5397-8-171-S1.pdf]
